# Supplementary material for: Fabrication of Ag/γ-Fe2O3@TiO2hollow magnetic core–shell nanospheres as highly efficient catalysts for the synthesis of β-enaminones
Source: Royal Society of Chemistry journal article supplement (doi:10.1039/c5ra14878b), 2015-01-01
Supplement: c5ra14878b1.pdf [file c5ra14878b1.pdf]

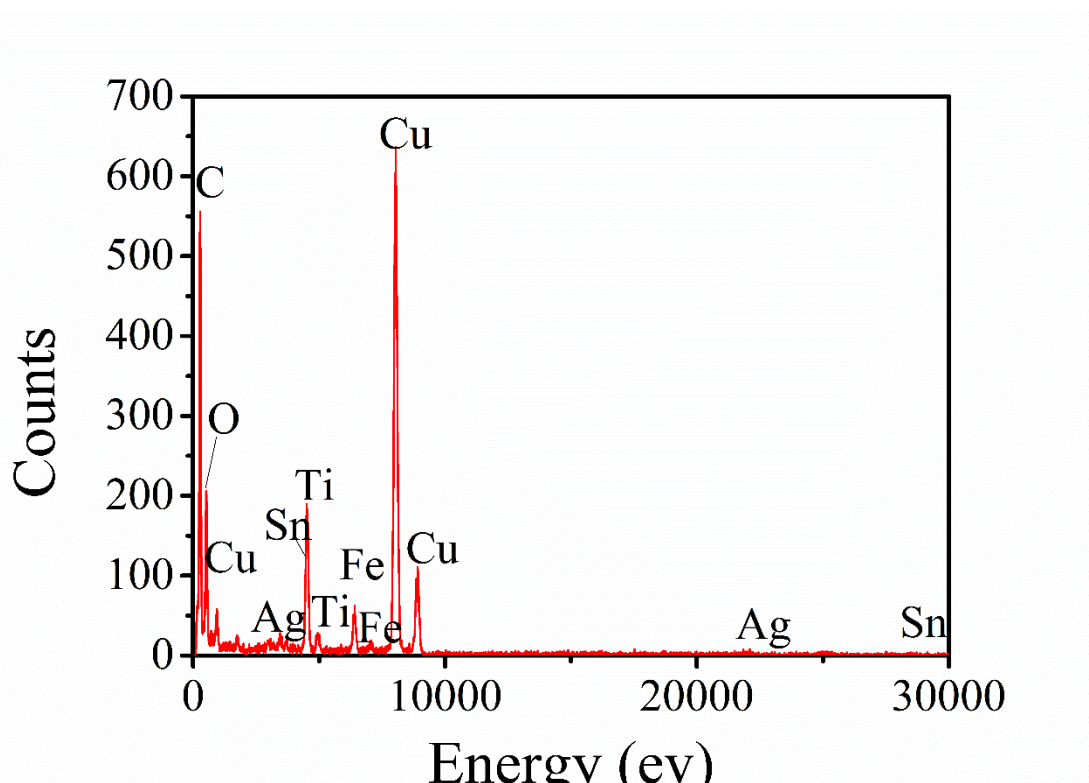

EDX of Ag/ $\gamma$ -Fe<sub>2</sub>O<sub>3</sub>@meso-TiO<sub>2</sub>

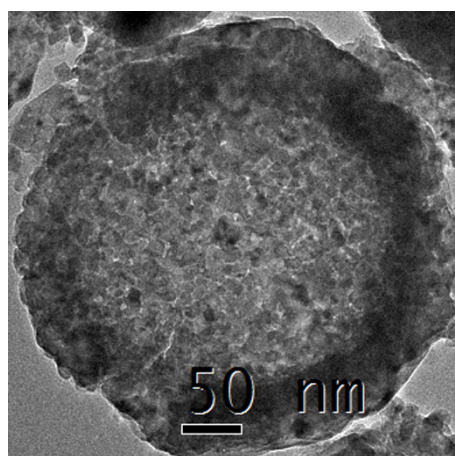

A TEM image of Ag/ $\gamma$ -Fe<sub>2</sub>O<sub>3</sub>@meso-TiO<sub>2</sub> which was recycled five times.

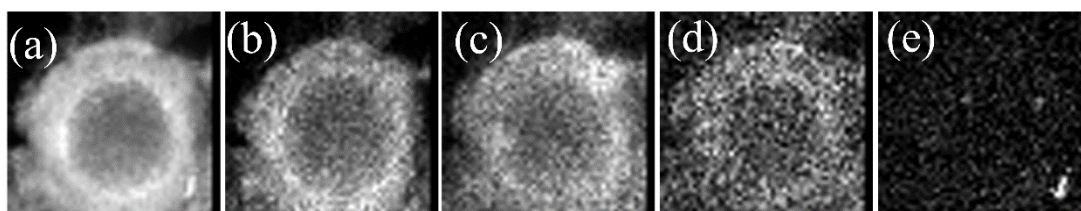

(a) the high angle annular dark field-scanning transmission electron microscopy (HAADF-STEM) image and mapping results of the elements (b) Ti, (c) O and (d) Fe (e) Ag for the Ag/ $\gamma$ -Fe<sub>2</sub>O<sub>3</sub>@meso-TiO<sub>2</sub>.
